# Supplementary material
Source: Springer Nature journal article supplement (https://www.springermedizin.de/resource/supplementary/12967_2013_1763_MOESM1_ESM.pdf/9575298)

# Additional file 1

## Figure S1: Treatment protocol

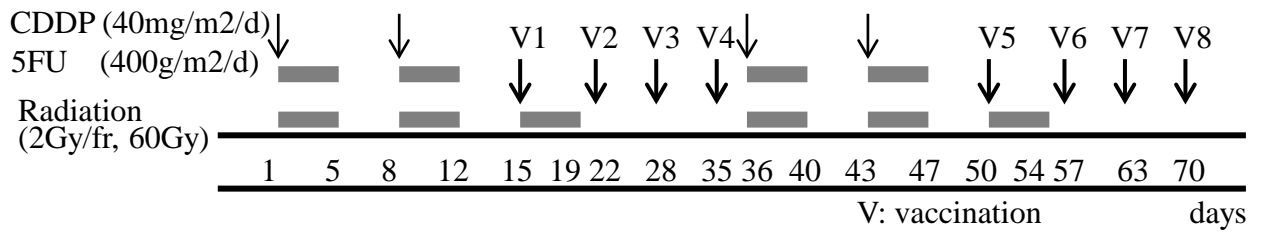

Supplement: MOESM1 [file 9575298]
